# Supplementary material
Source: Springer Nature journal article supplement (https://www.springermedizin.de/resource/supplementary/12875_2009_385_MOESM1_ESM.pdf/9434502)
Supplement: MOESM1 [file 9434502]

## **Problems experienced**

## **Strategy used**

## **Objective**

**Gaining  
sufficient insight**

**Relying on information from  
the district nurse and others**

**Good enough insight**
